# Supplementary material for: Rapid formation of superelastic 3D reduced graphene oxide networks with simultaneous removal of HI utilizing NIR irradiation
Source: Royal Society of Chemistry journal article supplement (doi:10.1039/c5ta00920k), 2015-01-01
Supplement: c5ta00920k4.pdf [file c5ta00920k4.pdf]

## Supporting Information

# Rapid formation of superelastic 3D reduced graphene oxide networks with simultaneous removal of HI utilizing NIR irradiation

Qiuwei Shi,<sup>a</sup> Chengyi Hou,<sup>a</sup> Hongzhi Wang,<sup>\*a</sup> Qinghong Zhang<sup>b</sup> and Yaogang Li<sup>\*b</sup>

<sup>a</sup> State Key Laboratory for Modification of Chemical Fibers and Polymer Materials, College of Materials Science and Engineering, Donghua University, Shanghai 201620, P. R. China. E-mail: wanghz@dhu.edu.cn; Fax: +86-021-67792855; Tel: +86-021-67792881

<sup>b</sup> Engineering Research Center of Advanced Glasses Manufacturing Technology, Ministry of Education, College of Materials Science and Engineering, Donghua University, Shanghai 201620, P. R. China. E-mail: yaogang\_li@dhu.edu.cn; Fax: +86-021-67792855; Tel: +86-021-67792526

**Supplementary Information 1:** Low magnified view of cross-sectional SEM images of GF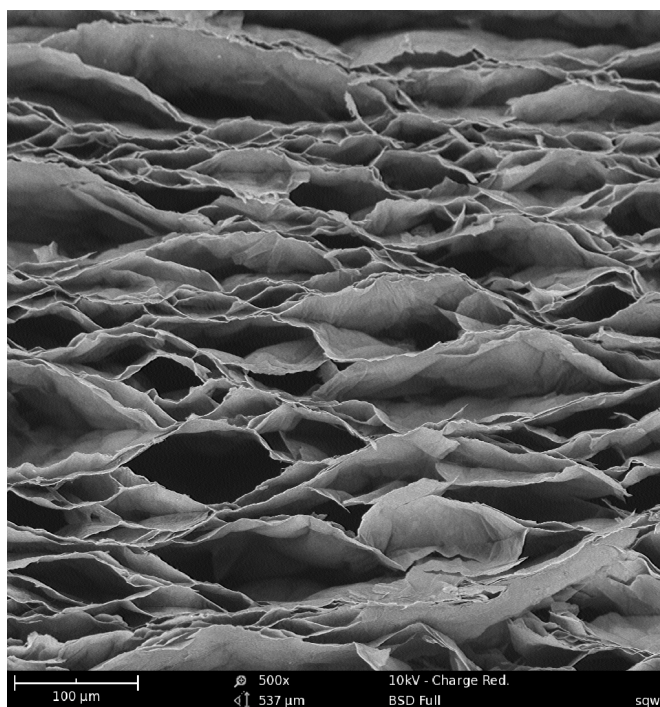

Fig. S1 Low magnified view of cross-sectional SEM image of GF irradiated by 4 W/cm<sup>2</sup> NIR light for 5 s.

The SEM image was characterized by Phenom G2 Pro Scanning electron microscopy at 10.0 kV.

**Supplementary Information 2: EDS spectra of the top and bottom surface of the GF1**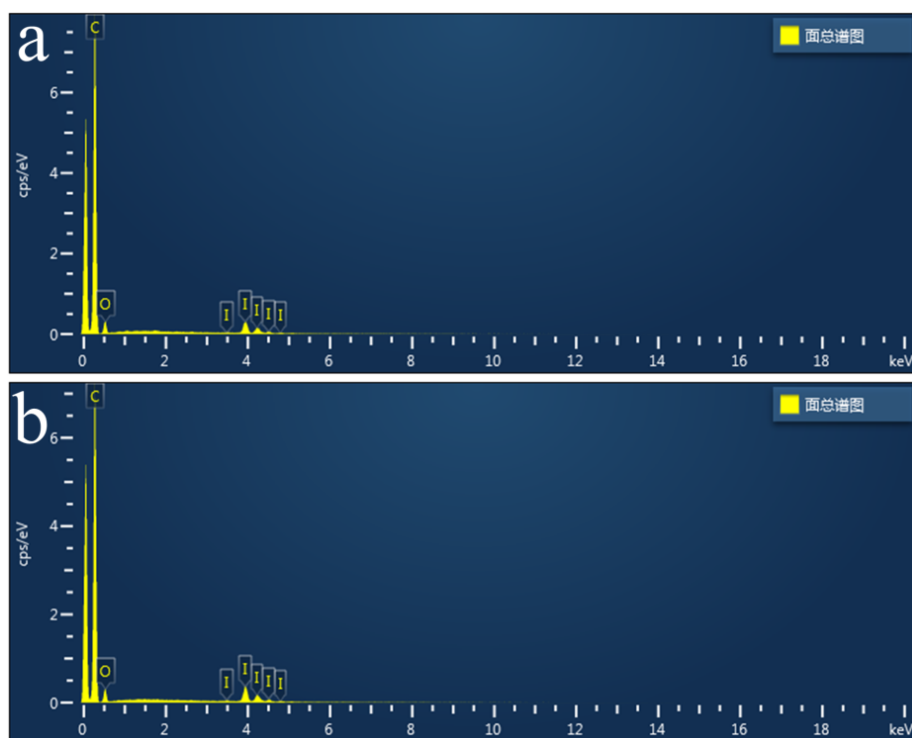

Fig. S2 EDS spectra of the top (a) and bottom (b) surface of the GF1. The result from the EDS spectrum in Fig. S2 shows that the elemental mass of C, O, I in top and bottom of GF1 was no obvious difference.

Energy dispersive X-ray spectrum of each element was obtained using a JSM-6700F FESEM equipped with an Oxford Instruments EDS detector.

**Supplementary Information 3: Brunauer-Emmett-Teller (BET) analysis of GF1**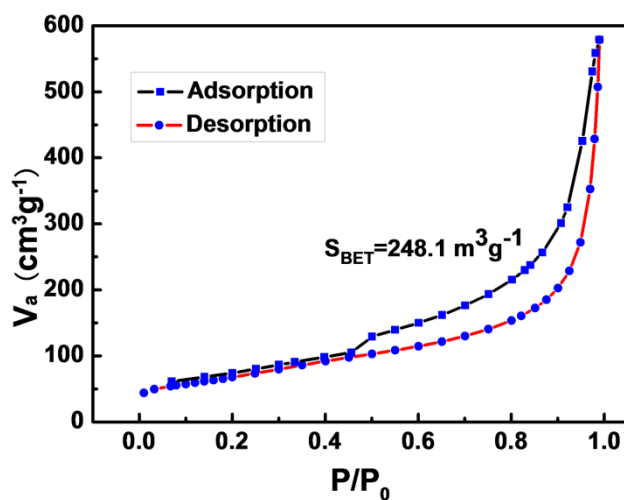

**Fig. S3.**  $\text{N}_2$  adsorption-desorption isotherms of the sample of GF1 (irradiated by NIR laser with power density is  $4 \text{ W/cm}^2$ ).

$\text{N}_2$  adsorption-desorption isotherms curve of the porous structure GF which was prepared by NIR laser irradiation (power density:  $4 \text{ W/cm}^2$ ) is illustrated in Fig. S2. On the basis of the IUPAC nomenclature, the porous structure GF1 perform a type IV isotherm, with type H1 hysteresis loops for the relative pressure  $P/P_0$  in the range  $0.45\text{--}1.0$ .<sup>1</sup> Furthermore, the Brunauer-Emmett-Teller (BET) analysis exhibits that the specific surface area of the porous structured GF1 is up to  $248.1 \text{ m}^2/\text{g}$ .

The specific surface area of the graphene foam was tested using physical adsorption of  $\text{N}_2$  at liquid-nitrogen temperature on an automatic volumetric sorption analyzer ASAP 2020.

## References

1. P. J. M. Carrott, R. A. Roberts and K. S. W. Sing, *Carbon*, 1987, **25**, 59.

**Supplementary Video S1.** A real-time view of formation process of 3D graphene networks, showing iodine vapor releasing.

**Supplementary Video S2.** A real-time view of formation process of 3D graphene networks, showing that the released iodine vapor rendered starch iodide paper blue.

**Supplementary Video S3.** A real-time thermal imaging of formation process of 3D graphene networks, showing that its surface temperature changed remarkably.
